# Supplementary material for: Electrochemiluminescence detection of Escherichia coli O157:H7 based on mesoporous Ca-doped MgAl2O3–G–SiO2 biosensor
Source: Royal Society of Chemistry journal article supplement (doi:10.1039/d2nj03870f), 2022-01-01
Supplement: d2nj03870f1.pdf [file d2nj03870f1.pdf]

# Electrochemiluminescence Detection of *Escherichia coli* O157:H7 Based on Mesoporous Ca-Doped MgAl<sub>2</sub>O<sub>3</sub>-G-SiO<sub>2</sub> Biosensor

*Ze-da Meng*<sup>4</sup>, *Chong-Hun Jung*<sup>3</sup> & *Won-Chun Oh*<sup>1, 2\*</sup>

<sup>1</sup> *Department of Advanced Materials Science & Engineering, Hanseo University, Seosan-si, Chungnam, Korea, 31962*

<sup>2</sup> *Anhui International Joint Research Center for Nano Carbon-based Materials and Environmental Health, College of Materials Science and Engineering, Anhui University of Science & Technology, Huainan 232001, PR China*

<sup>3</sup> *Decommissioning Technology Research Division, Korea Atomic Energy Research Institute, P.O. Box 105, Yuseong, Daejeon, Korea, 305-600*

<sup>4</sup> *School of Chemistry and Life Science, Suzhou University of Science and Technology, Suzhou 215009, China*

---

\*Corresponding author

E-mail: [wc\\_oh@hanseo.ac.kr](mailto:wc_oh@hanseo.ac.kr)

Tel: +82-41-660-1337, Fax: +82-41-688-3352

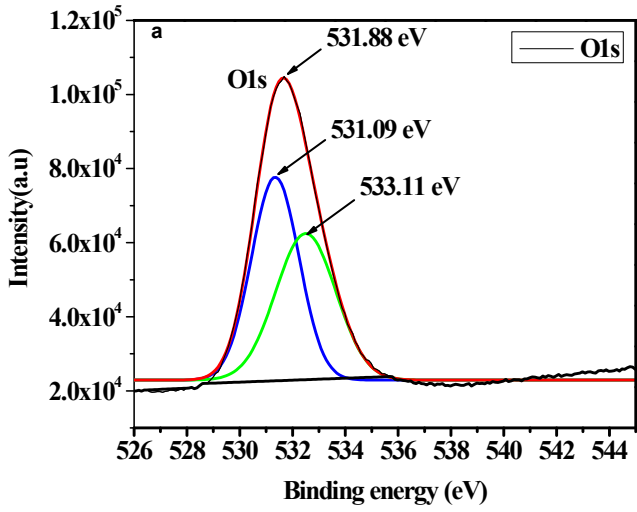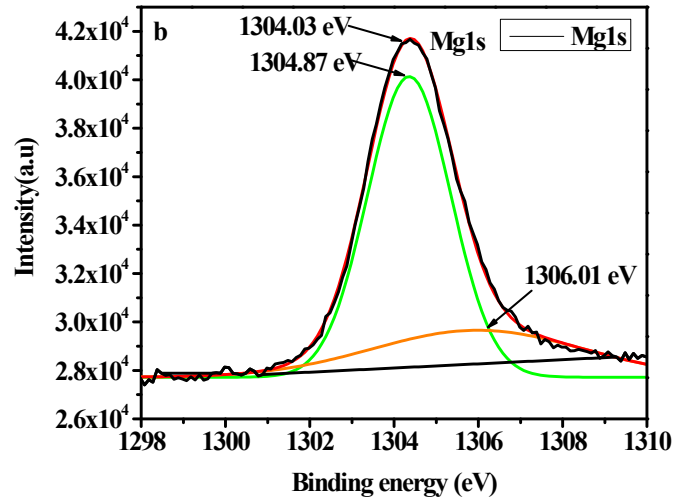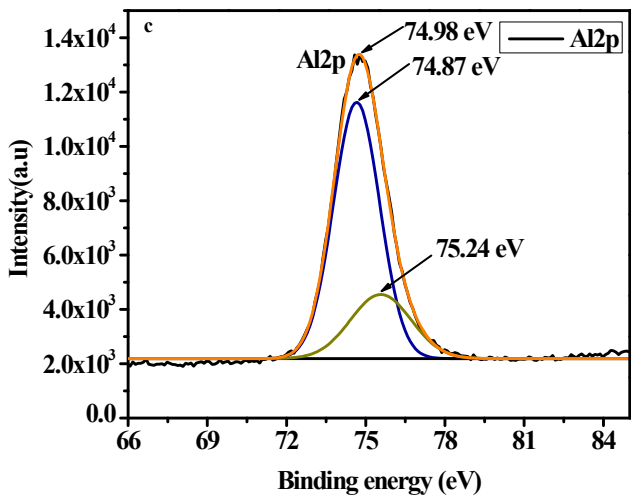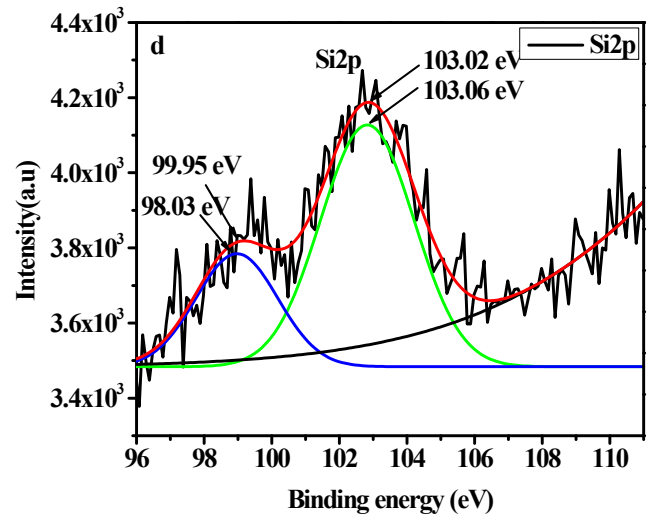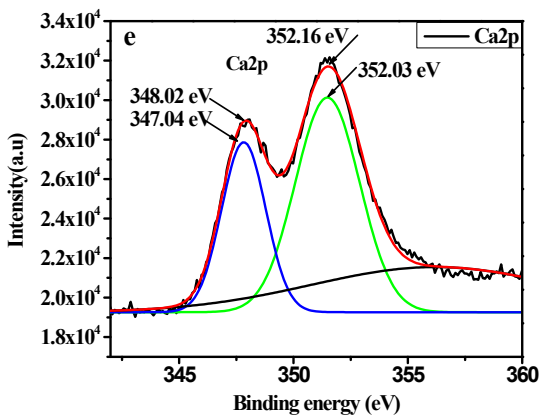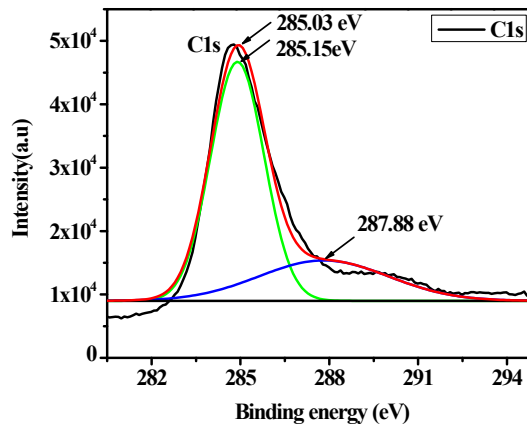

Fig.S1. (a) XPS spectra of O1s, (b) Mg1s, (c) Al2p, (d) Si2p, (e) Ca2p, (f) C1s.
